# Supplementary material
Source: PubMed Central journal article supplement (PMC4403660)
Supplement: JB.02564-14_zjb999093577so1.pdf [file JB.02564-14_zjb999093577so1.pdf]

**Table S1. Bacterial strains used in this study**

| <b>Strain</b>         | <b>Genotype</b>                                                                                                                                                                                                         | <b>Source/Reference</b> |
|-----------------------|-------------------------------------------------------------------------------------------------------------------------------------------------------------------------------------------------------------------------|-------------------------|
| DH5 $\alpha$          | <i>E. coli supE44</i> $\Delta$ lacU169 ( $\phi$ 80lacZ $\Delta$ M15)<br><i>hsdR17 recA1 endA1 gyrA96 thi-1 relA1</i>                                                                                                    | Invitrogen              |
| DH5 $\alpha$ /RK212.1 | DH5 $\alpha$ with conjugation transfer element                                                                                                                                                                          | (1)                     |
| BL21 (DE3)            | F <sup>-</sup> <i>ompT gal [dcm] [lon] hsdS<sub>B</sub> (r<sub>B</sub><sup>-</sup> m<sub>B</sub><sup>-</sup></i> ;<br>an <i>E. coli</i> B strain) with DE3, a $\lambda$ prophage<br>carrying the T7 RNA polymerase gene | (2)                     |
| 81-176                | Wild-type <i>C. jejuni</i> clinical isolate                                                                                                                                                                             | (3)                     |
| DRH212                | 81-176 <i>rpsL</i> <sup>Sm</sup>                                                                                                                                                                                        | (4)                     |
| DRH461                | DRH212 $\Delta$ <i>astA</i>                                                                                                                                                                                             | (5)                     |
| DRH119                | DRH212/pRY112                                                                                                                                                                                                           | This study              |
| PML242                | DRH212 <i>Cjj1483</i> <sub>D58A</sub>                                                                                                                                                                                   | This study              |
| PML321                | DRH212 <i>Cjj1484::cat-rpsL</i>                                                                                                                                                                                         | This study              |
| PML322                | DRH212 <i>Cjj1483::cat-rpsL</i>                                                                                                                                                                                         | This study              |
| PML324                | DRH461 <i>Cjj1483::cat-rpsL</i>                                                                                                                                                                                         | This study              |
| PML335                | DRH212 $\Delta$ <i>Cjj1483</i>                                                                                                                                                                                          | This study              |
| PML337                | DRH461 $\Delta$ <i>Cjj1483</i>                                                                                                                                                                                          | This study              |
| PML360                | DRH212 $\Delta$ <i>Cjj1484</i>                                                                                                                                                                                          | This study              |
| PML624                | DRH212 $\Delta$ <i>Cjj1483</i> /pPML533                                                                                                                                                                                 | This study              |
| PML642                | DRH212 $\Delta$ <i>Cjj1483</i> /pRY112                                                                                                                                                                                  | This study              |
| PML739                | DRH461 <i>Cjj1483</i> <sub>D58E</sub>                                                                                                                                                                                   | This study              |
| PML769                | DRH461 <i>Cjj1483</i> <sub>D58N</sub>                                                                                                                                                                                   | This study              |
| PML973                | DRH212 $\Delta$ <i>Cjj1484</i> /pPML968                                                                                                                                                                                 | This study              |
| PML1129               | DRH212 $\Delta$ <i>Cjj1484</i> /pPML1119                                                                                                                                                                                | This study              |
| PML1133               | DRH212 $\Delta$ <i>Cjj1484</i> /pDAR1604                                                                                                                                                                                | This study              |
| PML1137               | DRH212/pDAR1604                                                                                                                                                                                                         | This study              |
| PML1262               | DRH212 <i>Cjj0064::cat-rpsL</i>                                                                                                                                                                                         | This study              |
| PML1274               | DRH212 <i>chuC::cat-rpsL</i>                                                                                                                                                                                            | This study              |
| PML1280               | DRH212 <i>Cjj1386::cat-rpsL</i>                                                                                                                                                                                         | This study              |
| PML1305               | DRH212 <i>Cjj1619::cat-rpsL</i>                                                                                                                                                                                         | This study              |

**Table S2. Plasmids used in this study**

| Plasmid     | Genotype/Description                                                                                                                                      | Source/Reference    |
|-------------|-----------------------------------------------------------------------------------------------------------------------------------------------------------|---------------------|
| pUC19       | Amp <sup>r</sup>                                                                                                                                          | New England Biolabs |
| pGEX-4T-2   | Amp <sup>R</sup> ; Tc <sup>R</sup>                                                                                                                        | GE Healthcare       |
| pRY108      | Km <sup>R</sup> ; <i>E. coli</i> - <i>C. jejuni</i> shuttle vector                                                                                        | (6)                 |
| pRY112      | Cm <sup>R</sup> ; <i>E. coli</i> - <i>C. jejuni</i> shuttle vector                                                                                        | (6)                 |
| pET28-6XHis | Km <sup>R</sup> ; pET28 containing a 6xHis-maltose binding protein fusion upstream of a TEV cleavage site                                                 | (7)                 |
| MalE        |                                                                                                                                                           |                     |
| pDRH265     | pUC19:: <i>cat-rpsL</i>                                                                                                                                   | (4)                 |
| pDAR812     | pUC19 with the <i>Cjj1484-Cjj1483</i> locus from 81-176 cloned into the BamHI site                                                                        | This study          |
| pDAR1604    | pRY108 with the promoter and start codon of <i>flaA</i> from 81-176 with an in-frame fusion of codons for a FLAG-tag cloned into the XbaI and BamHI sites | This study          |
| pLKB156     | pUC19 with the <i>chuCD</i> genes from 81-176 cloned into the BamHI site                                                                                  | This study          |
| pPML101     | pDAR812 with a mutation to generate a HpaI site in <i>Cjj1484</i>                                                                                         | This study          |
| pPML102     | pDAR812 with a <i>cat-rpsL</i> cassette cloned into the EcoRV site of <i>Cjj1483</i>                                                                      | This study          |
| pPML107     | Same as pPML106 with <i>cat-rpsL</i> cloned into the HpaI site of <i>Cjj1484</i> in opposite orientation                                                  | This study          |
| pPML113     | pDAR812 with an in-frame deletion of codons 2-225 of <i>Cjj1483</i>                                                                                       | This study          |
| pPML165     | pGEX-4T-2 with codons 2 – stop codon of <i>Cjj1483</i> cloned into the BamHI site                                                                         | This study          |
| pPML239     | pDAR812 with a mutation to encode <i>Cjj1483</i> <sub>D58A</sub>                                                                                          | This study          |
| pPML278     | pGEX-4T-2 with codons 2 – stop codon of <i>Cjj1483</i> <sub>D58A</sub> cloned into the BamHI site                                                         | This study          |
| pPML334     | pDAR812 with an in-frame deletion of codons 2-402 of <i>Cjj1484</i>                                                                                       | This study          |
| pPML340     | pDAR812 with a mutation encode <i>Cjj1483</i> <sub>D58E</sub>                                                                                             | This study          |
| pPML533     | pRY112 with a fragment containing 400 bp upstream of <i>Cjj1483</i> through the stop codon inserted into the BamHI site                                   | This study          |
| pPML732     | pDAR812 with a mutation to encode <i>Cjj1483</i> <sub>D58N</sub>                                                                                          | This study          |
| pPML757     | pGEX-4T-2 with codons 2 – stop codon of <i>Cjj1483</i> <sub>D58E</sub> cloned into the BamHI site                                                         | This study          |
| pPML758     | pGEX-4T-2 with codons 2 – stop codon of <i>Cjj1483</i> <sub>D58E</sub> cloned into the BamHI site                                                         | This study          |
| pPML770     | pUC19 with the <i>Cjj0063</i> locus from 81-176 cloned into the BamHI site                                                                                | This study          |
| pPML771     | pUC19 with the <i>Cjj1386</i> locus from 81-176 cloned into the BamHI site                                                                                | This study          |
| pPML772     | pUC19 with the <i>Cjj1619</i> locus from 81-176 cloned into the BamHI site                                                                                | This study          |

|          |                                                                                                   |            |
|----------|---------------------------------------------------------------------------------------------------|------------|
| pPML817  | pDAR812 with a mutation to encode <i>Cjj1484</i> <sub>H195A</sub>                                 | This study |
| pPML848  | pET28-6xHis-MalE with codons 2 – stop codon of <i>Cjj1484</i> cloned into the BamHI site          | This study |
| pPML968  | pDAR1604 with codons 2 – stop codon of <i>Cjj1484</i> cloned into the BamHI site                  | This study |
| pPML1119 | pDAR1604 with codons 2 – stop codon of <i>Cjj1484</i> <sub>H195A</sub> cloned into the BamHI site | This study |
| pPML1247 | pPML772 with a mutation to generate a HpaI site in <i>Cjj1619</i>                                 | This study |
| pPML1249 | pLKB156 with a <i>cat-rpsL</i> cassette cloned into the ClaI site of <i>chuC</i>                  | This study |
| pPML1253 | pPML770 with a <i>cat-rpsL</i> cassette cloned into the EcoRV site of <i>Cjj0064</i>              | This study |
| pPML1254 | pPML771 with a <i>cat-rpsL</i> cassette cloned into the HpaI site of <i>Cjj1386</i>               | This study |
| pPML1261 | pPML1247 with a <i>cat-rpsL</i> cassette cloned into the HpaI site of <i>Cjj1619</i>              | This study |

**Table S3. Complete list of genes differentially expressed in *C. jejuni* 81-176 Sm<sup>R</sup> Δ1484 compared to WT *C. jejuni* 81-176 Sm<sup>Ra</sup>**

| <b>Locus Tag</b> | <b>Gene Name</b> | <b>Putative Function</b>                            | <b>Ratio WT/<br/>mutant</b> | <b>Reference</b> |
|------------------|------------------|-----------------------------------------------------|-----------------------------|------------------|
| 81176_0315       | <i>peb3</i>      | glycoprotein; putative adhesin or transport protein | 3.52                        | (8-10)           |
| 81176_1619       | <i>exbB2</i>     | ferric enterobactin transport protein               | 3.44                        | (11)             |
| 81176_1339       | <i>flaA</i>      | major flagellin                                     | 2.87                        | (12)             |
| 81176_0211       |                  | possible transferrin transport protein              | 2.70                        | (13, 14)         |
| 81176_1620       | <i>exbD2</i>     | ferric enterobactin transport protein               | 2.62                        | (11)             |
| 81176_0210       |                  | possible transferrin transport protein              | 2.51                        | (13, 14)         |
| 81176_0722       | <i>glnA</i>      | glutamine synthetase                                | 2.35                        |                  |
| 81176_0580       |                  | hypothetical inner membrane protein                 | 2.06                        |                  |
| 81176_0438       |                  | gluconate dehydrogenase, subunit III                | 0.07                        | (15)             |
| 81176_0439       |                  | gluconate dehydrogenase, subunit I                  | 0.08                        | (15)             |
| 81176_0885       |                  | putative cytochrome c                               | 0.33                        |                  |

<sup>a</sup> Expression of genes was increased or decreased by two-fold in the *C. jejuni* ΔCj1484 mutant.

**Table S4. Complete list of genes differentially expressed in *C. jejuni* 81-176 Sm<sup>R</sup> Δ1483 compared to WT *C. jejuni* 81-176 Sm<sup>Ra</sup>**

| Locus Tag  | Gene Name    | Putative Function                                               | Ratio WT/<br>mutant | Reference |
|------------|--------------|-----------------------------------------------------------------|---------------------|-----------|
| 81176_0204 |              | putative periplasmic glycoprotein                               | 5.87                | (16)      |
| 81176_0075 |              | putative cytochrome c subfamily protein                         | 3.95                |           |
| 81176_0206 |              | phase-variable motility protein                                 | 3.77                | (17, 18)  |
| 81176_1312 |              | phase-variable flagellin glycosylation protein                  | 3.73                | (19)      |
| 81176_1208 |              | putative periplasmic protein                                    | 3.17                |           |
| 81176_1435 |              | capsular polysaccharide modification protein                    | 2.93                | (20)      |
| 81176_0283 | <i>eptC</i>  | lipid A phosphoethanolamine transferase                         | 2.51                | (21, 22)  |
| 81176_0722 | <i>glnA</i>  | putative glutamine synthetase                                   | 2.37                |           |
| 81176_1257 | <i>ciaC</i>  | invasion protein                                                | 2.23                | (23)      |
| 81176_1422 | <i>hddC</i>  | capsular polysaccharide biosynthesis                            | 2.13                | (24)      |
| 81176_1603 | <i>chuC</i>  | hemin transport ATP-binding protein                             | 0.09                | (25)      |
| 81176_1386 |              | hypothetical protein                                            | 0.11                |           |
| 81176_0439 |              | gluconate dehydrogenase, subunit I                              | 0.13                | (15)      |
| 81176_0438 |              | gluconate dehydrogenase, subunit III                            | 0.14                | (15)      |
| 81176_0463 | <i>mfrA</i>  | methylmenaquinol:fumarate reductase protein A                   | 0.16                | (26)      |
| 81176_1385 |              | hypothetical protein                                            | 0.19                |           |
| 81176_1604 | <i>chuD</i>  | hemin transport substrate-binding protein                       | 0.22                | (25)      |
| 81176_0063 |              | hypothetical protein                                            | 0.27                |           |
| 81176_0464 | <i>mfrB</i>  | methylmenaquinol:fumarate reductase protein B                   | 0.28                | (26)      |
| 81176_0433 | <i>frdA</i>  | fumarate reductase/succinate dehydrogenase flavoprotein subunit | 0.32                | (27)      |
| 81176_0064 |              | cytochrome c family protein                                     | 0.32                |           |
| 81176_1619 | <i>exbB2</i> | ferric enterobactin transport protein                           | 0.33                | (11)      |
| 81176_1602 | <i>chuB</i>  | hemin transport permease protein                                | 0.34                | (25)      |
| 81176_     |              | hypothetical protein                                            | 0.36                |           |
| 81176_     | <i>metC</i>  | hypothetical protein                                            | 0.38                |           |
| 81176_1620 | <i>exbD2</i> | ferric enterobactin transport protein                           | 0.39                | (11)      |
| 81176_1353 | <i>ceuD</i>  | enterochelin transport, ATP-binding protein                     | 0.39                | (28)      |
| 81176_1699 | <i>rplV</i>  | 50S ribosomal protein L22                                       | 0.39                |           |
| 81176_0123 | <i>dcuA</i>  | C4-dicarboxylate transporter                                    | 0.40                | (29)      |
| 81176_0122 | <i>aspA</i>  | aspartate ammonia-lyase                                         | 0.41                | (29)      |
| 81176_0561 | <i>oorA</i>  | 2-oxoglutarate:acceptor oxidoreductase                          | 0.41                |           |
| 81176_1693 | <i>rplX</i>  | 50S ribosomal protein L24                                       | 0.42                |           |
| 81176_0471 | <i>cfrB</i>  | enterobactin receptor                                           | 0.42                | (30)      |

|            |             |                                               |      |      |
|------------|-------------|-----------------------------------------------|------|------|
| 81176_0432 | <i>frdC</i> | fumarate reductase, cytochrome b subunit      | 0.42 | (27) |
| 81176_0291 |             | putative endoribonuclease L-PSP               | 0.43 |      |
| 81176_0478 | <i>thiC</i> | thiamine biosynthesis protein                 | 0.45 |      |
| 81176_1600 | <i>chuZ</i> | heme oxygenase                                | 0.45 | (25) |
| 81176_1580 | <i>rplK</i> | 30S ribosomal protein S11                     | 0.45 |      |
| 81176_0211 |             | possible transferrin transport protein        | 0.45 | (13) |
| 81176_1160 |             | LOS biosynthesis                              | 0.45 |      |
| 81176_1162 |             | LOS biosynthesis                              | 0.46 |      |
| 81176_0128 |             | putative periplasmic protein                  | 0.46 |      |
| 81176_0465 | <i>mfrE</i> | methylmenaquinol:fumarate reductase protein E | 0.47 | (26) |
| 81176_0210 |             | possible transferrin transport protein        | 0.47 |      |
| 81176_0758 |             | putative periplasmic protein                  | 0.47 |      |
| 81176_0066 |             | putative cytochrome c                         | 0.48 |      |
| 81176_0655 | <i>hypE</i> | hydrogenase isoenzyme formation protein       | 0.50 |      |

<sup>a</sup> Expression of genes was increased or decreased by two-fold in the *C. jejuni*  $\Delta Cj1483$  mutant.

## References

1. **Figurski DH, Helinski DR.** 1979. Replication of an origin-containing derivative of plasmid RK2 dependent on a plasmid function provided in trans. Proc Natl Acad Sci U S A **76**:1648-1652.
2. **Studier FW, Rosenberg AH, Dunn JJ, Dubendorff JW.** 1990. Use of T7 RNA polymerase to direct expression of cloned genes. Methods Enzymol **185**:60-89.
3. **Korlath JA, Osterholm MT, Judy LA, Forfang JC, Robinson RA.** 1985. A point-source outbreak of campylobacteriosis associated with consumption of raw milk. J Infect Dis **152**:592-596.
4. **Hendrixson DR, Akerley BJ, DiRita VJ.** 2001. Transposon mutagenesis of *Campylobacter jejuni* identifies a bipartite energy taxis system required for motility. Mol Microbiol **40**:214-224.
5. **Hendrixson DR, DiRita VJ.** 2003. Transcription of  $\sigma^{54}$ -dependent but not  $\sigma^{28}$ -dependent flagellar genes in *Campylobacter jejuni* is associated with formation of the flagellar secretory apparatus. Mol Microbiol **50**:687-702.
6. **Yao R, Alm RA, Trust TJ, Guerry P.** 1993. Construction of new *Campylobacter* cloning vectors and a new mutational *cat* cassette. Gene **130**:127-130.
7. **Orchard RC, Kittisopikul M, Altschuler SJ, Wu LF, Suel GM, Alto NM.** 2012. Identification of F-actin as the dynamic hub in a microbial-induced GTPase polarity circuit. Cell **148**:803-815.
8. **Linton D, Allan E, Karlyshev AV, Cronshaw AD, Wren BW.** 2002. Identification of *N*-acetylgalactosamine-containing glycoproteins PEB3 and CgpA in *Campylobacter jejuni*. Mol Microbiol **43**:497-508.

9. **Rangarajan ES, Bhatia S, Watson DC, Munger C, Cygler M, Matte A, Young NM.** 2007. Structural context for protein N-glycosylation in bacteria: The structure of PEB3, an adhesin from *Campylobacter jejuni*. *Protein Sci* **16**:990-995.
10. **Min T, Vedadi M, Watson DC, Wasney GA, Munger C, Cygler M, Matte A, Young NM.** 2009. Specificity of *Campylobacter jejuni* adhesin PEB3 for phosphates and structural differences among its ligand complexes. *Biochemistry* **48**:3057-3067.
11. **Zeng X, Xu F, Lin J.** 2013. Specific TonB-ExbB-ExbD energy transduction systems required for ferric enterobactin acquisition in *Campylobacter*. *FEMS Microbiol Lett* **347**:83-91.
12. **Guerry P, Logan SM, Thornton S, Trust TJ.** 1990. Genomic organization and expression of *Campylobacter* flagellin genes. *J Bacteriol* **172**:1853-1860.
13. **Palyada K, Threadgill D, Stintzi A.** 2004. Iron acquisition and regulation in *Campylobacter jejuni*. *J Bacteriol* **186**:4714-4729.
14. **Miller CE, Rock JD, Ridley KA, Williams PH, Ketley JM.** 2008. Utilization of lactoferrin-bound and transferrin-bound iron by *Campylobacter jejuni*. *J Bacteriol* **190**:1900-1911.
15. **Pajaniappan M, Hall JE, Cawthraw SA, Newell DG, Gaynor EC, Fields JA, Rathbun KM, Agee WA, Burns CM, Hall SJ, Kelly DJ, Thompson SA.** 2008. A temperature-regulated *Campylobacter jejuni* gluconate dehydrogenase is involved in respiration-dependent energy conservation and chicken colonization. *Mol Microbiol* **68**:474-491.



16. **Ding W, Nothaft H, Szymanski CM, Kelly J.** 2009. Identification and quantification of glycoproteins using ion-pairing normal-phase liquid chromatography and mass spectrometry. *Molecular & cellular proteomics* : MCP **8**:2170-2185.
17. **Kim KS, Kim MJ, Kononen E, Lounatmaa K, Summanen P, Finegold SM.** 2012. Single nucleotide polymorphisms are randomly dispersed and mostly synonymous in partial rpoB and cpn60 genes of *Campylobacter showae* human isolates. *Anaerobe* **18**:626-629.
18. **Artymovich K, Kim JS, Linz JE, Hall DF, Kelley LE, Kalbach HL, Kathariou S, Gaymer J, Paschke B.** 2013. A "successful allele" at *Campylobacter jejuni* contingency locus Cj0170 regulates motility; "successful alleles" at locus Cj0045 are strongly associated with mouse colonization. *Food Microbiology* **34**:425-430.
19. **Hitchen P, Brzostek J, Panico M, Butler JA, Morris HR, Dell A, Linton D.** 2010. Modification of the *Campylobacter jejuni* flagellin glycan by the product of the Cj1295 homopolymeric-tract-containing gene. *Microbiology* **156**:1953-1962.
20. **van Alphen LB, Wenzel CQ, Richards MR, Fodor C, Ashmus RA, Stahl M, Karlyshev AV, Wren BW, Stintzi A, Miller WG, Lowary TL, Szymanski CM.** 2014. Biological roles of the O-methyl phosphoramidate capsule modification in *Campylobacter jejuni*. *PLoS One* **9**:e87051.
21. **Cullen TW, Trent MS.** 2010. A link between the assembly of flagella and lipooligosaccharide of the Gram-negative bacterium *Campylobacter jejuni*. *Proc Natl Acad Sci U S A* **107**:5160-5165.

22. **Cullen TW, O'Brien JP, Hendrixson DR, Giles DK, Hobb RI, Thompson SA, Brodbelt JS, Trent MS.** 2013. EptC of *Campylobacter jejuni* mediates phenotypes involved in host interactions and virulence. *Infect Immun* **81**:430-440.
23. **Christensen JE, Pacheco SA, Konkel ME.** 2009. Identification of a *Campylobacter jejuni*-secreted protein required for maximal invasion of host cells. *Mol Microbiol* **73**:650-662.
24. **Karlyshev AV, Everest P, Linton D, Cawthraw S, Newell DG, Wren BW.** 2004. The *Campylobacter jejuni* general glycosylation system is important for attachment to human epithelial cells and in the colonization of chicks. *Microbiology* **150**:1957-1964.
25. **Ridley KA, Rock JD, Li Y, Ketley JM.** 2006. Heme utilization in *Campylobacter jejuni*. *J Bacteriol* **188**:7862-7875.
26. **Guccione E, Hitchcock A, Hall SJ, Mulholland F, Shearer N, van Vliet AH, Kelly DJ.** 2010. Reduction of fumarate, mesaconate and crotonate by Mfr, a novel oxygen-regulated periplasmic reductase in *Campylobacter jejuni*. *Environ Microbiol* **12**:576-591.
27. **Weingarten RA, Taveirne ME, Olson JW.** 2009. The dual-functioning fumarate reductase is the sole succinate:quinone reductase in *Campylobacter jejuni* and is required for full host colonization. *J Bacteriol* **191**:5293-5300.
28. **Richardson PT, Park SF.** 1995. Enterochelin acquisition in *Campylobacter coli*: characterization of components of a binding-protein-dependent transport system. *Microbiology* **141**:3181-3191.
29. **Guccione E, Leon-Kempis Mdel R, Pearson BM, Hitchin E, Mulholland F, van Diemen PM, Stevens MP, Kelly DJ.** 2008. Amino acid-dependent growth of *Campylobacter jejuni*: key roles for aspartase (AspA) under microaerobic and oxygen-

limited conditions and identification of AspB (Cj0762), essential for growth on glutamate. *Mol Microbiol* **69**:77-93.

30. **Xu F, Zeng X, Haigh RD, Ketley JM, Lin J.** 2010. Identification and Characterization of a New Ferric Enterobactin Receptor, CfrB, in *Campylobacter*. *J Bacteriol* **192**:4425-4435.
